# Supplementary material for: Sleep, immunity and shift workers: A review
Source: PubMed Central journal article supplement — Sleep Sci. 2016 Nov 6;9(3):164–8. doi: 10.1016/j.slsci.2016.10.007 (PMC5241621; doi:10.1016/j.slsci.2016.10.007), 2016-11-06
Supplement: mmc1.pdf [file mmc1.pdf]

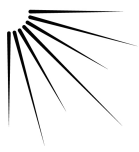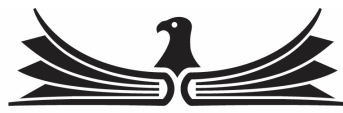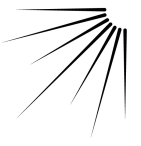

AMERICAN MANUSCRIPT EDITORS

# English Editing Certificate

This document certifies that the manuscript listed below was edited for proper English language, grammar, punctuation, and spelling by the expert staff at American Manuscript Editors.

Manuscript Title:  
Shift work and immunity

Authors:  
C. Almeida, A. Malheiro

Date Issued:  
October 15, 2016

Certificate Verification Key:  
385-991-704-800-935

Project Number:  
14696

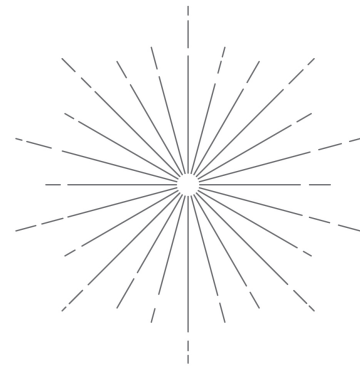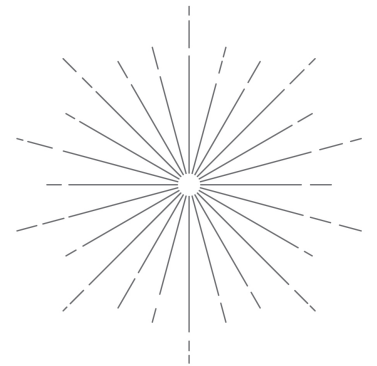

This certificate may be verified by emailing [info@americanmanuscripteditors.com](mailto:info@americanmanuscripteditors.com). Documents receiving this certificate should be prepared for publication. However, please note that the author has the ability to accept or reject our suggestions for changes and can make changes after the editing process is complete, all of which can adversely affect the quality of the text after the editing process.
